# Supplementary material
Source: PubMed Central journal article supplement (PMC3998104)
Supplement: NIHMS558125-supplement-1.pdf [file NIHMS558125-supplement-1.pdf]

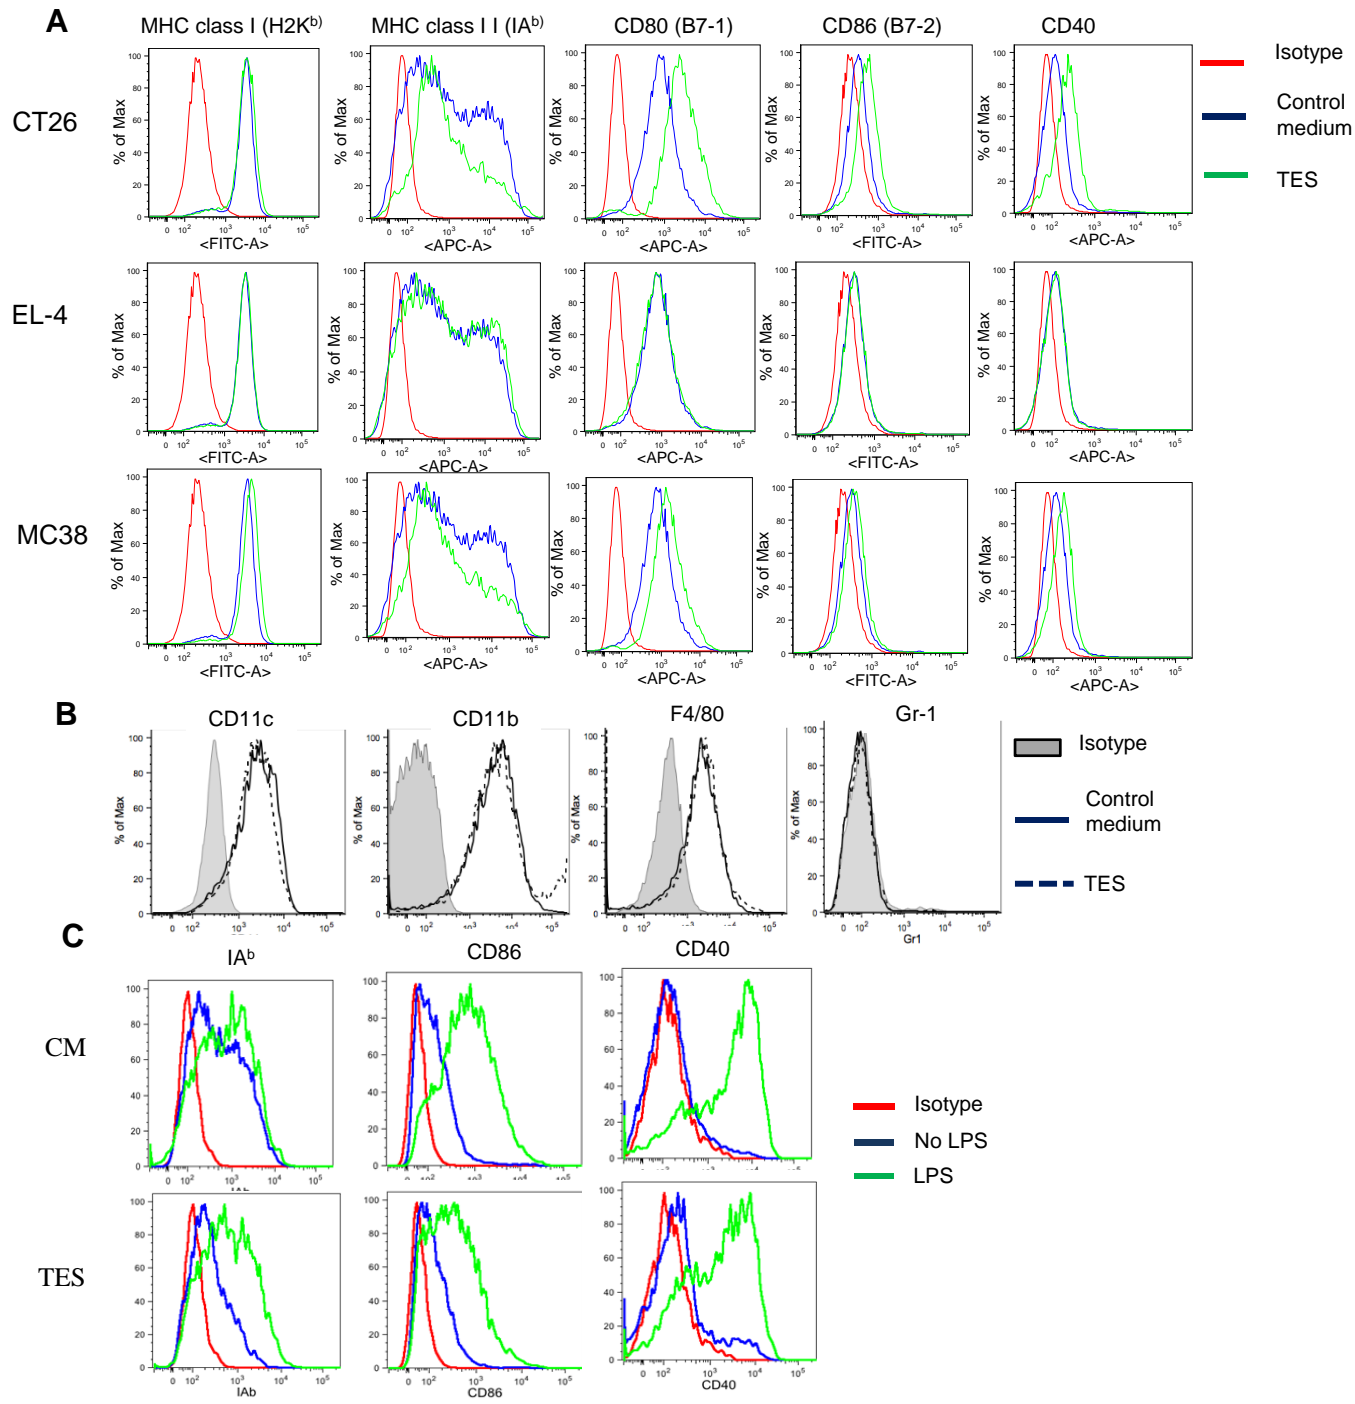

Figure S1

**Figure S1. Effect of tumor explant supernatants on the expression of MHC class I, II and co-stimulatory molecules on DCs and cross-presentation of OVA.** **A.** DCs were generated from bone marrow progenitor with GM-CSF. On day 3 medium was replaced with one containing 20% v/v tumor explant supernatants (TES) from three different tumors: CT 26, EL4, or MC38. Two days later, cells were collected and analyzed. Expression of MHC class I, II, and co-stimulatory molecules was analyzed in gated CD11c<sup>+</sup> cells. Typical example of 4 experiments is shown. **B.** The phenotype of cells cultured in the presence of TES. DCs were generated as described above in complete medium during 3-day culture with GM-CSF. On day 3 CD11c<sup>+</sup> cells were isolated using magnetic beads and cultured for additional 48 hr in the presence of TES from EL-4 tumors. The phenotype of the cells was evaluated by flow cytometry. **C.** DCs generated as described above were cultured with 500 ng/ml LPS overnight. Expression of indicated molecules within gated CD11c<sup>+</sup> cells was evaluated.

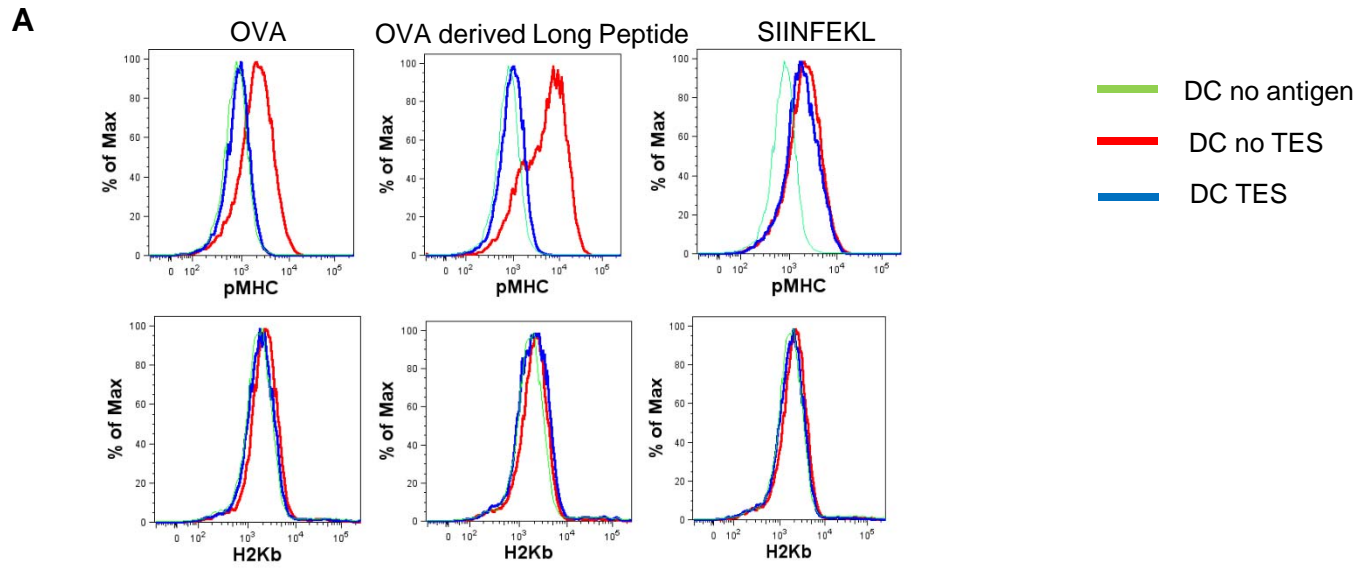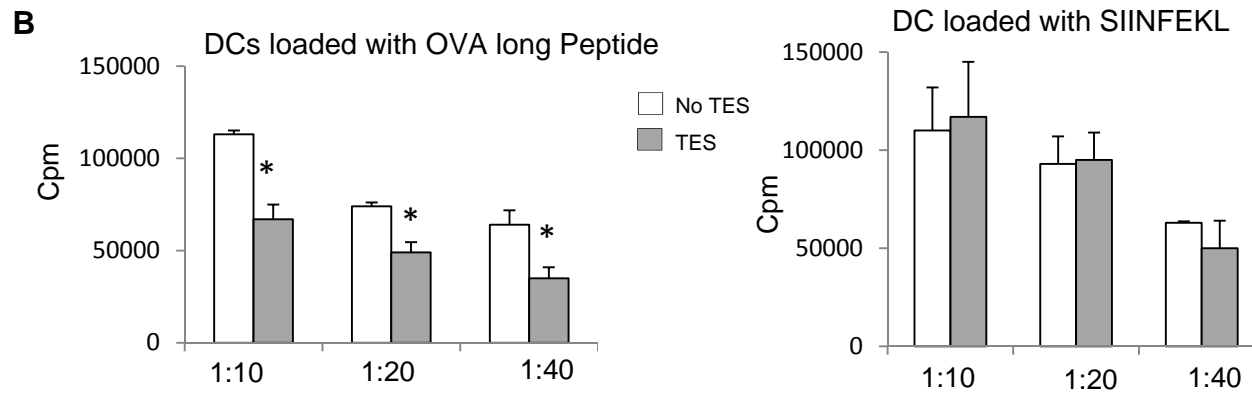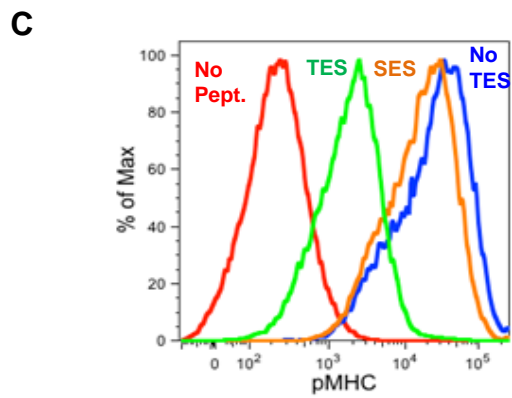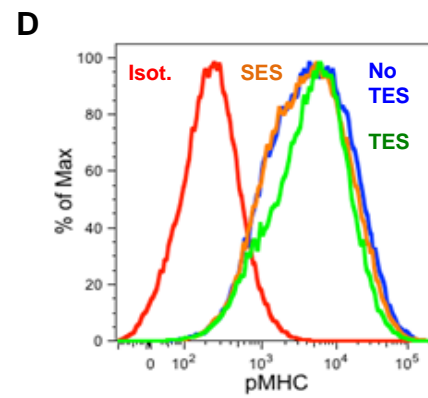

Figure S2

**Figure S2. Effect of tumor-derived factors and control spleen explant supernatant (SES) on pMHC and cross-presentation in DCs.** **A.** DCs were differentiated from BM progenitors with GM-CSF and IL-4. At day 5, CD11c<sup>+</sup> cells were isolated and cultured for 2 days with TES from EL4 tumors. DCs were loaded with OVA or long peptide during the last 24 hours of culture. **A.** Expression of pMHC and MHC class I (H2Kb) on DCs. **B.** Stimulation of OT-1 CD8<sup>+</sup> T-cell proliferation. T-cell proliferation was measured in triplicates. \* - p<0.05. **C.** DCs from WT mice cultured for 48 hr with either TES or explants from control splenocytes (SES). During last 24 hr in culture cells were loaded with long OVA-derived peptide and pMHC complexes were evaluated using 25-D1 antibody. **D.** DCs from OVA-Tg mice. Experiments were performed as above. Three experiments with the same results were performed.

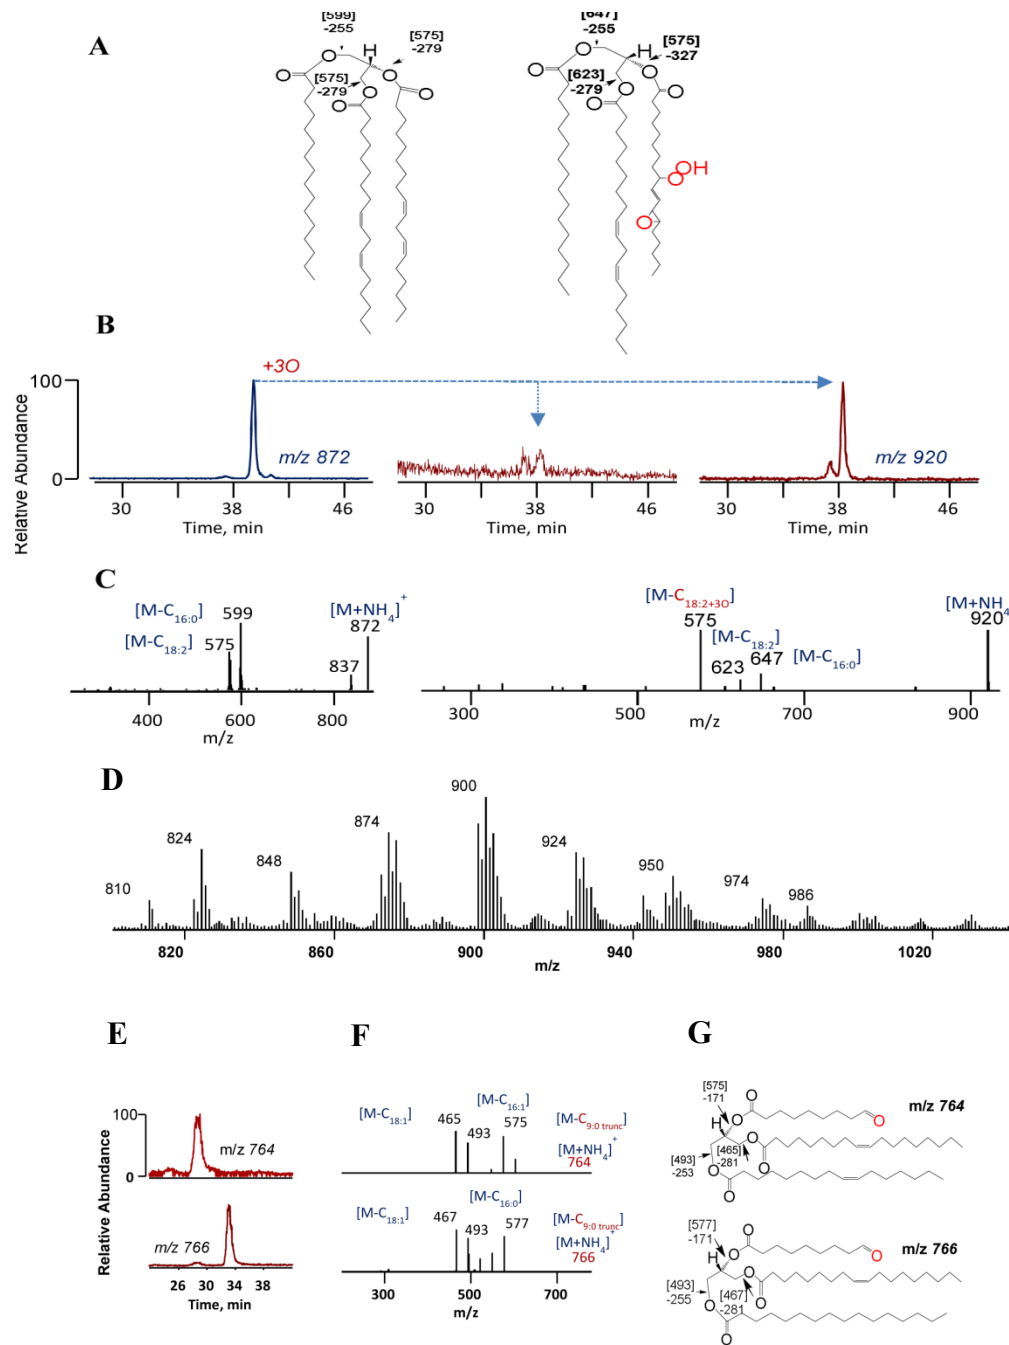

Figure S3

**Figure S3. Profile of oxidized lipids in DCs. A-C.** DCs isolated from TB mice. **A.** Suggested structure of TAGs at m/z 872 and its oxygenated metabolite at m/z 920. **B.** Typical LC-MS spectra of TAG ( $C_{18:2}/C_{18:2}/C_{16:0}$ ) at m/z 872 (left panel) and its oxygenated species ( $C_{18:2}/C_{18:2+3O}/C_{16:0}$ ) at m/z 920 in control (middle panel) and tumor-derived (left panel) DCs. **C.** MS<sup>2</sup> spectra of TAGs at m/z 872 (left panel) and m/z 920 (right panel). **D-G.** Fragmentation LC-MS analysis of oxidized lipids in human DCs. **D.** Typical MS<sup>1</sup> spectrum of TAGs from human DCs cultured with TCM. **E.** Typical LC-MS profiles of oxidized TAGs at m/z 764 and 766. **F.** MS<sup>2</sup> spectra of oxidized TAGs with m/z 764 and 766, respectively, containing molecular species  $C_{16:1}/C_{18:1}/C_{9:0+O}$  and  $C_{16:0}/C_{18:1}/C_{9:0+O}$  with truncated 9-oxo-nonanoic acid from DCs. **G.** Possible structures of oxTAGs m/z 764 and 766

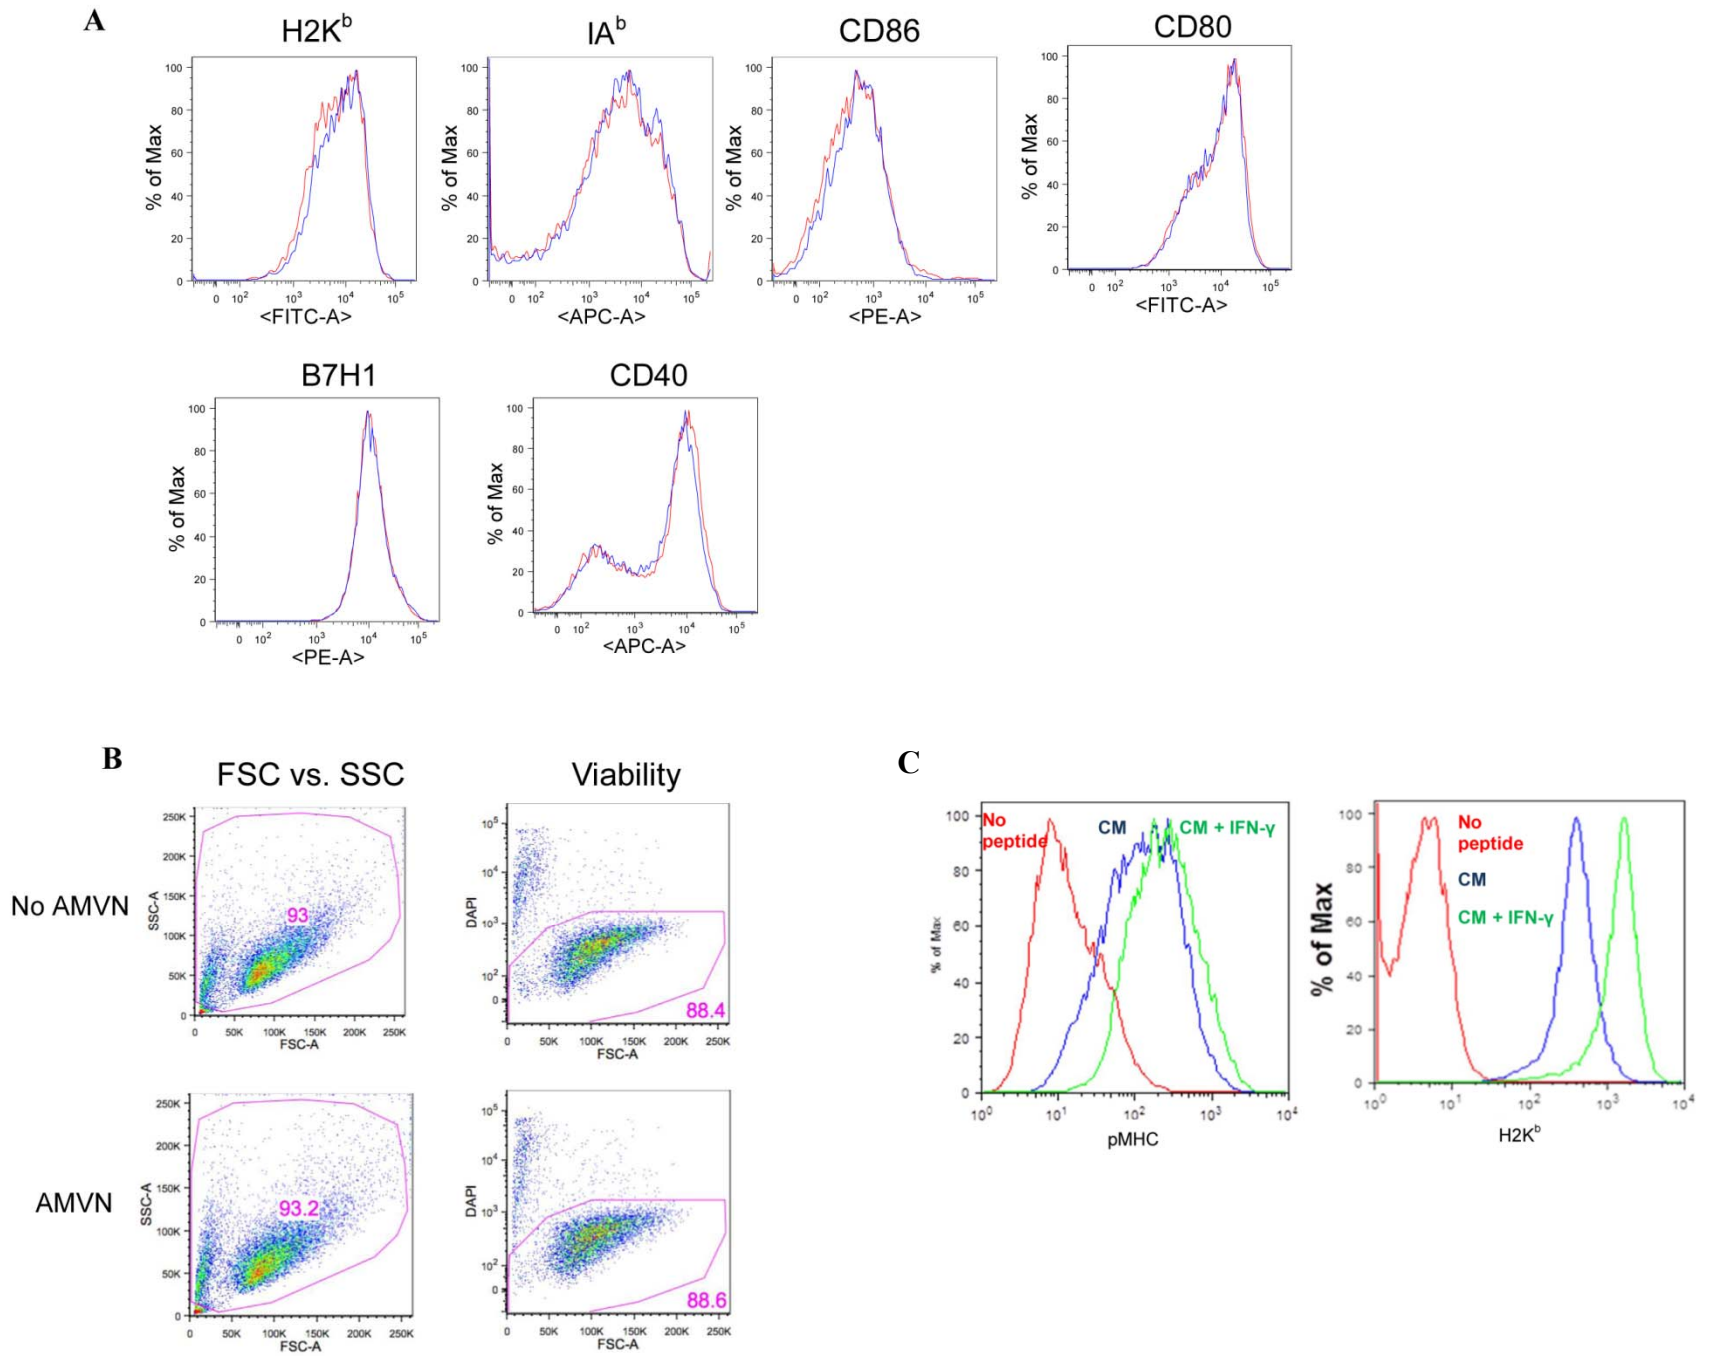

Figure S4

**Figure S4. Effect of AMVN on the expression of surface molecules on DCs and IFN- $\gamma$  on cross-presentation of long OVA-derived peptide.** **A.** DCs were generated from BM progenitors and treated for 2 hr with 0.5 mM AMVN. Cells were then washed and cultured in complete medium supplemented with GM-CSF for additional 24 hr. Cell phenotype was evaluated within CD11c<sup>+</sup> cell population. Red line – control, blue line cells treated with AMVN. Three experiments with the same results were performed. Similar results were obtained with AMVN concentration 0.2 mM. **B.** Viability of DCs treated with 0.5 mM AMVN. **C.** DCs were cultured with IFN- $\gamma$  (250 ng/ml) for 1 day, followed by loading with long OVA-derived peptide. Left panel – pMHC expression; right panel –MHC class I (H2K<sup>b</sup>) expression.
